Supplementary Material for “Spectral tuning of Amazon parrot feather coloration by psittacofulvin pigments and spongy structures” by Tinbergen, Wilts & Stavenga

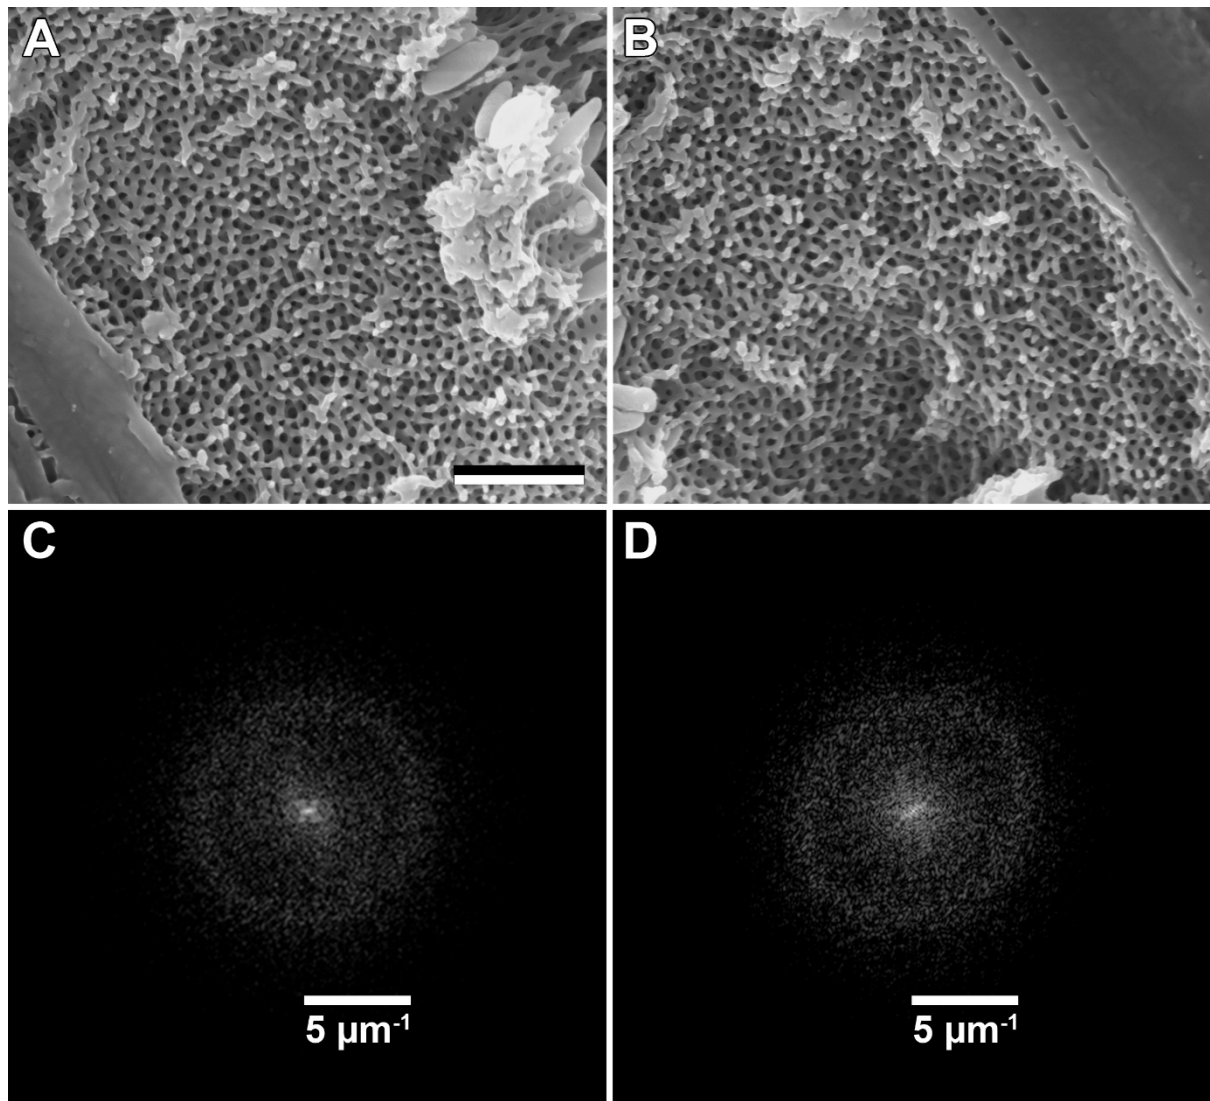

**Fig. S1.** Scanning electron micrographs and Fourier transforms of oblique sectioned green-colored feather barbs of a Panama amazon feather (compare Fig. 4). (A, B) Two different regions of a barb showing the inside of the spongy cells. (C, D) Power spectrum of the spongy cells of (A, B) calculated with a fast Fourier transform (FFT) using ImageJ (Schneider et al., 2012). The ring-like distribution around the centre indicates a quasi-periodic order of the spatial features (Stavenga et al., 2011; Saranathan et al., 2012). Scale bar: 2  $\mu\text{m}$  (A,B). In C and D, the unit distance represents a spatial frequency of 5  $\mu\text{m}^{-1}$ .

### Supplementary References

Schneider, C.A., Rasband, W.S. and Eliceiri, K.W. (2012) NIH Image to ImageJ: 25 years of image analysis. *Nat. Methods* **9**, 671-675.
